# Supplementary material for: The Genetic Architecture of a Congenital Heart Defect Is Related to Its Fitness Cost
Source: MDPI journal article supplement (doi:10.3390/genes12091368), 2021-08-31
Supplement: s1 [file s1]

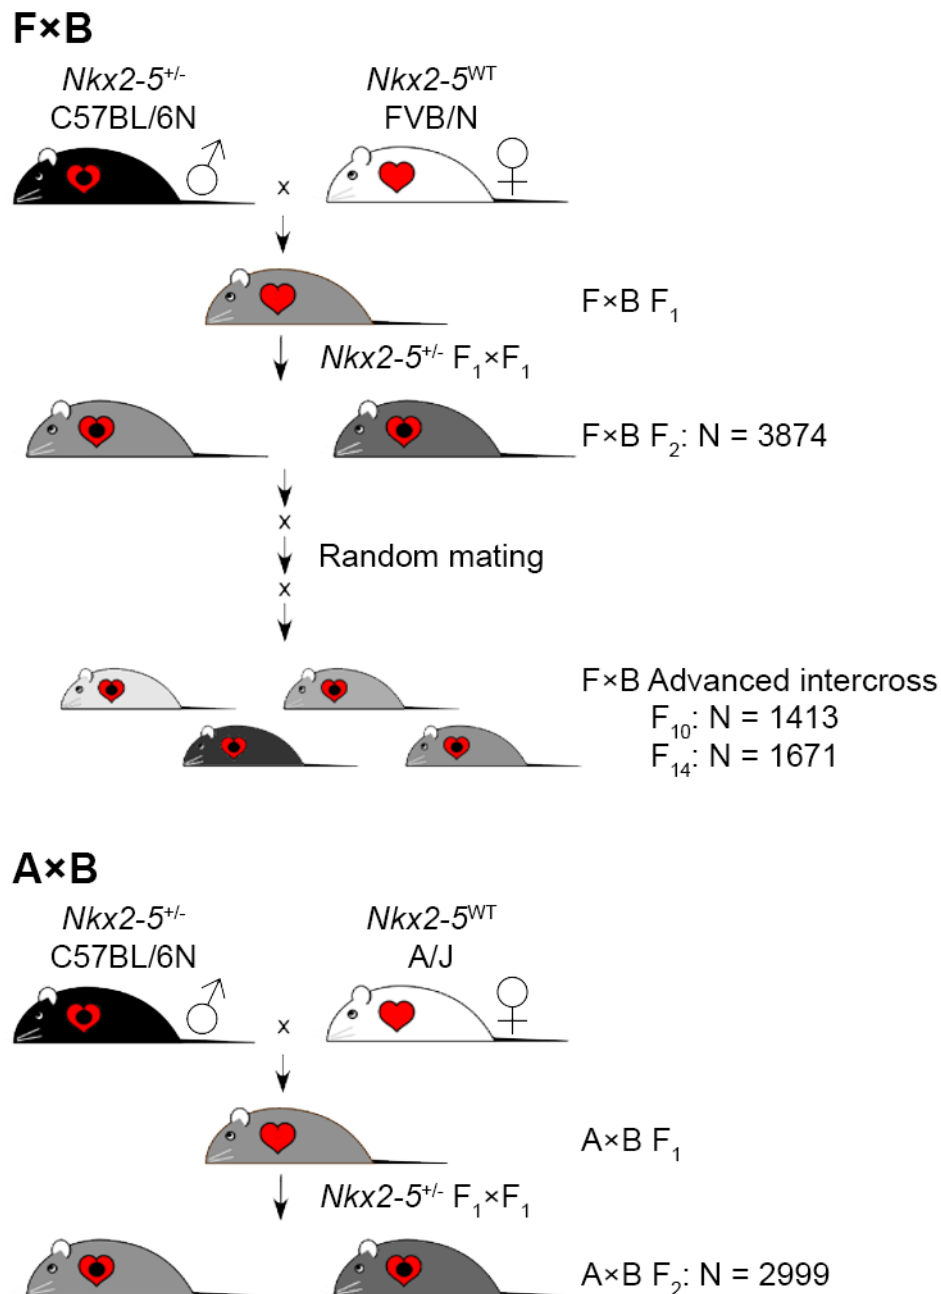

**Supplementary Figure S1. Breeding scheme for inbred strain intercrosses.** We produced F<sub>1</sub> hybrids by crossing wild-type FVB/N (F) or A/J (A) females to *Nkx2-5<sup>+/-</sup>* C57BL/6N (B) males. We phenotyped newborn *Nkx2-5<sup>+/-</sup>* F<sub>2</sub> pups from both A×B and F×B intercrosses and F<sub>10</sub> and F<sub>14</sub> pups from the F×B advanced intercross. The advanced intercross was produced by random mating of non-siblings and non-first cousins beginning in the F<sub>3</sub> and F<sub>4</sub> generations. The number of *Nkx2-5<sup>+/-</sup>* pups phenotyped in each generation is shown.

**a**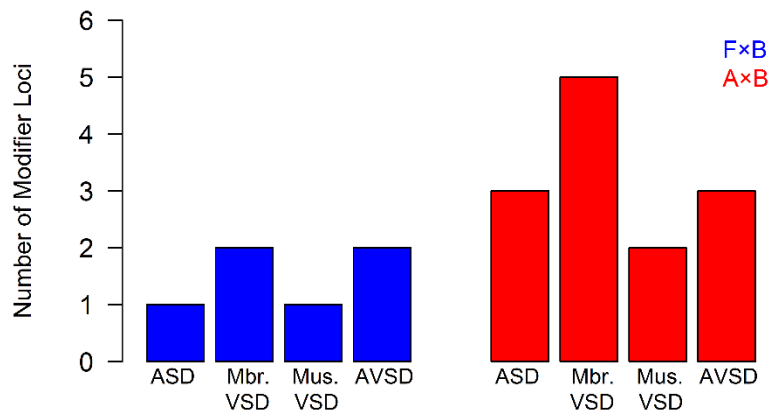**b**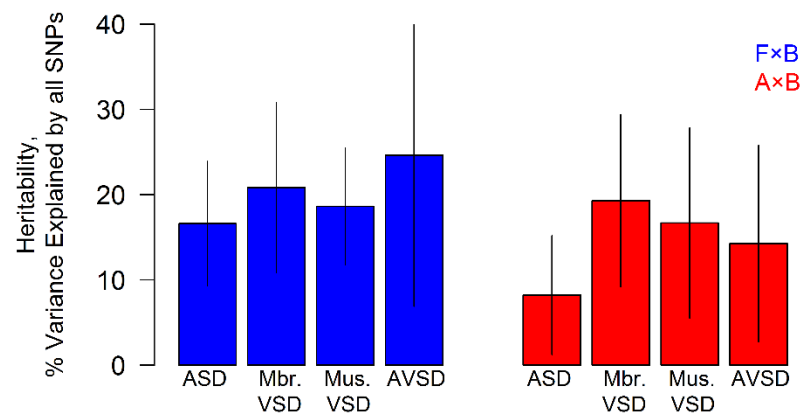

**Supplementary Figure S2.** Neither **a**, the number of significant and suggestive loci detected nor **b**, the heritability explained by all genotyped SNPs varies with the severity of a defect. Error bars are 95% C.I.

**Supplementary Figure S3.** The observed incidences at two-locus genotypes of ASD, membranous and muscular VSD, and AVSD are shown between every pair of suggestive or genome-wide significant modifier loci found in both crosses. In the two cases where there is only one suggestive locus, the locus is plotted against the next most significant locus in the cross.

### ASD: FxB

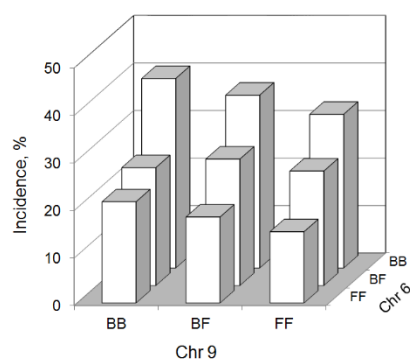

### ASD: AxB

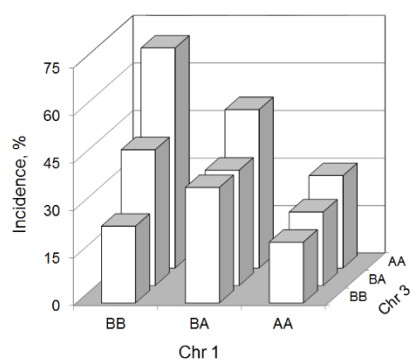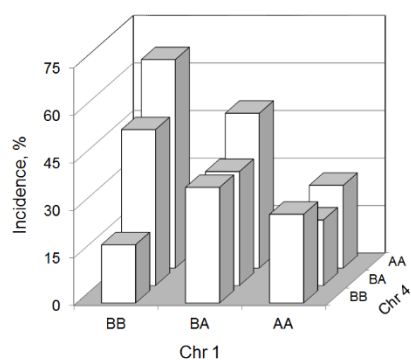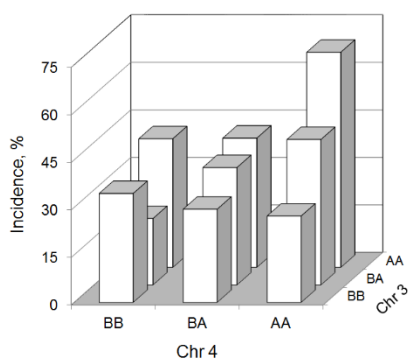

### Membranous VSD: FxB

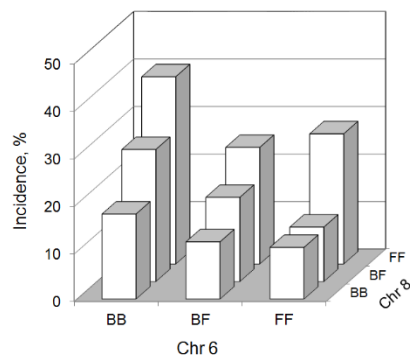

Membranous VSD: AxB

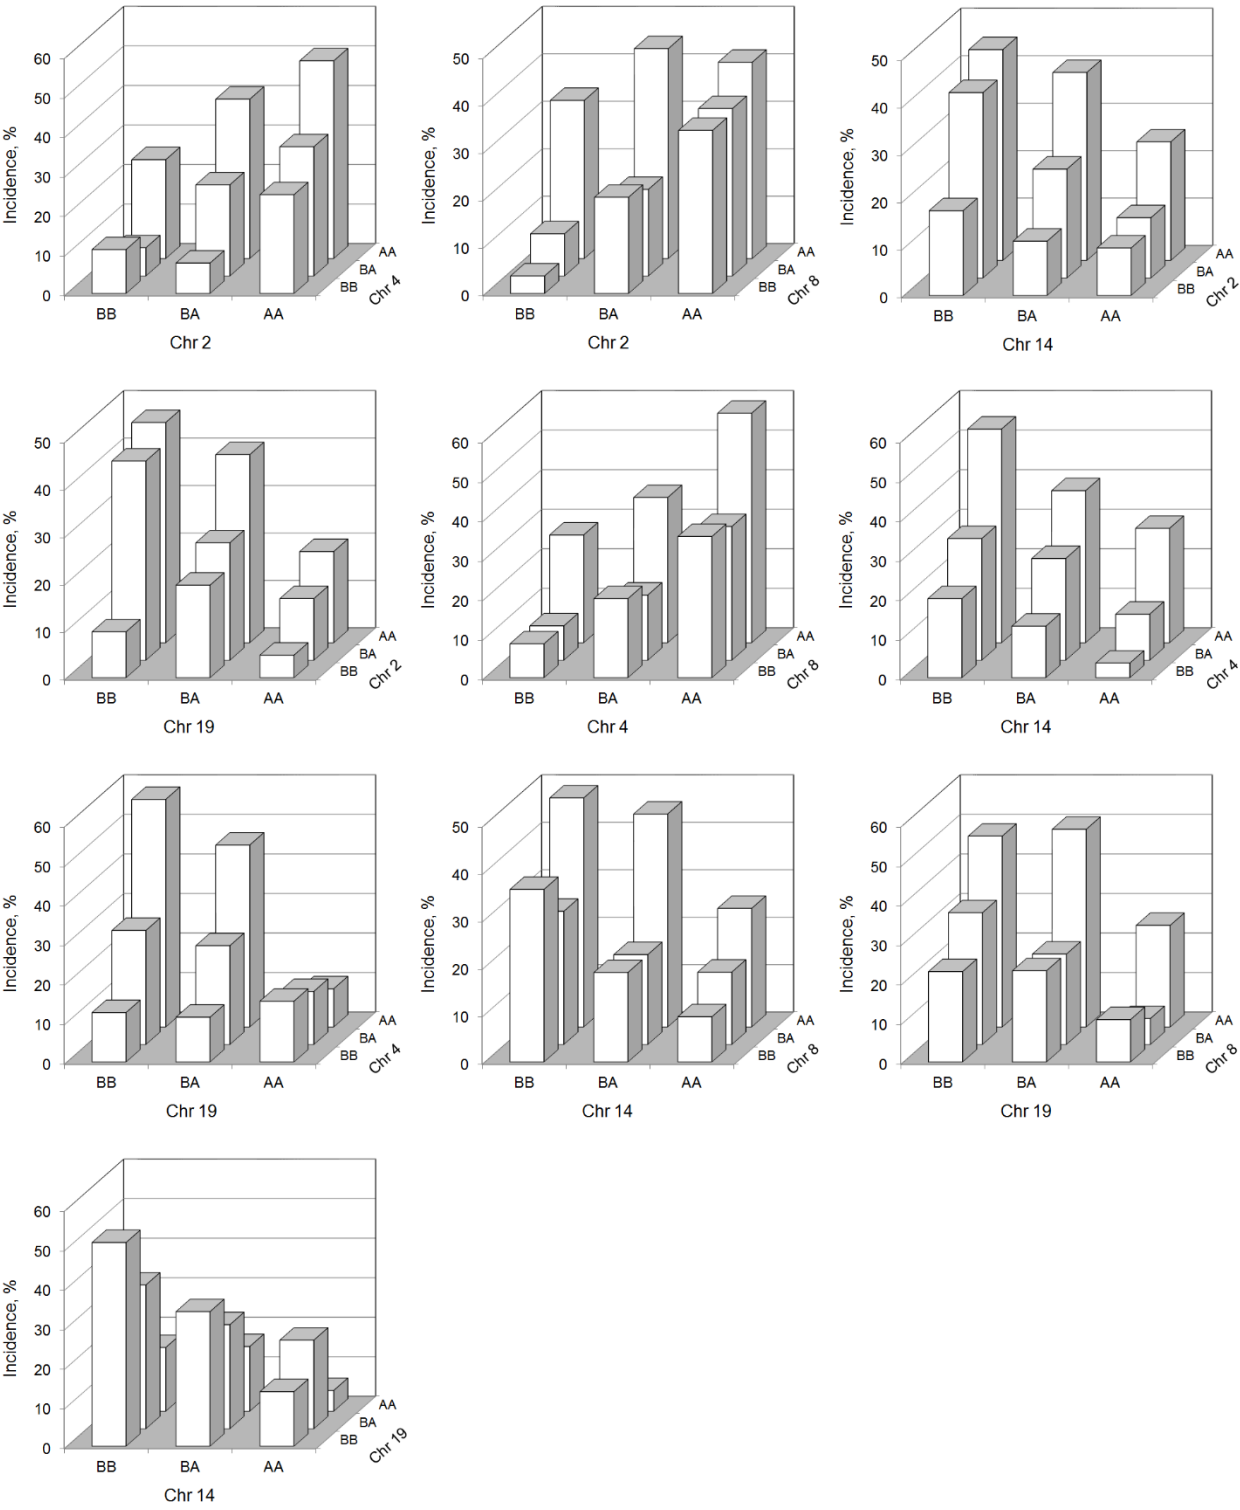

Muscular VSD: F×B

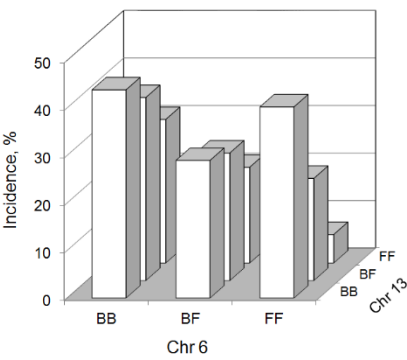

Muscular VSD: A×B

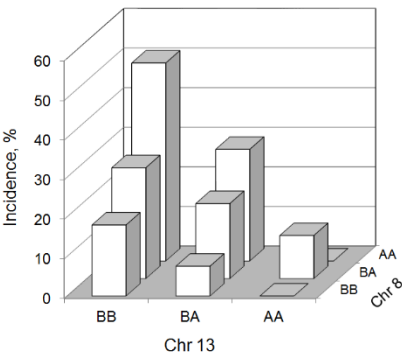

AVSD: FxB

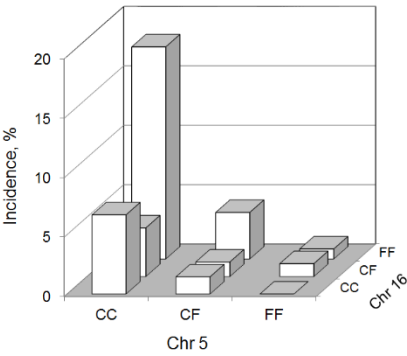

AVSD: AxB

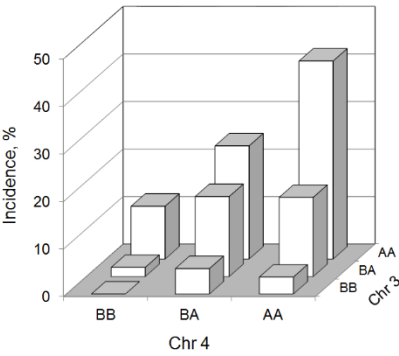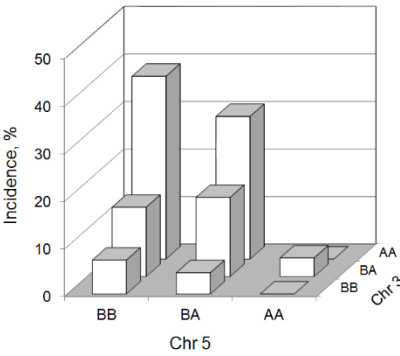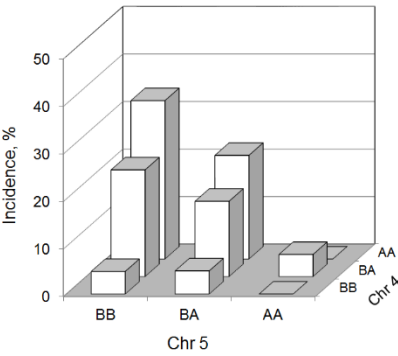

**Table S1**  
**SNPs in the A×B F2 intercross**

| SNP, rsID  | Chromosome | Centimorgans,<br>Cox sex-averaged | Minor allele<br>frequency |
|------------|------------|-----------------------------------|---------------------------|
| rs13475818 | 1          | 16.447                            | 0.474                     |
| rs3163007  | 1          | 32.307                            | 0.465                     |
| rs13475934 | 1          | 39.511                            | 0.456                     |
| rs3684360  | 1          | 54.7                              | 0.473                     |
| rs3701630  | 1          | 69.107                            | 0.470                     |
| rs6238909  | 1          | 84.931                            | 0.469                     |
| rs13476354 | 2          | 10.3282                           | 0.475                     |
| rs13459062 | 2          | 21.806                            | 0.475                     |
| rs3659784  | 2          | 62.098                            | 0.490                     |
| rs27349879 | 2          | 75.407                            | 0.497                     |
| rs3659658  | 2          | 89.467                            | 0.484                     |
| rs3676540  | 3          | 6.8289                            | 0.467                     |
| rs29807239 | 3          | 14.268                            | 0.472                     |
| rs3716258  | 3          | 24.097                            | 0.473                     |
| rs3706378  | 3          | 33.755                            | 0.481                     |
| rs13477291 | 3          | 43.5124                           | 0.479                     |
| rs31135898 | 3          | 53.0931                           | 0.500                     |
| rs30509660 | 3          | 63.036                            | 0.495                     |
| rs3685116  | 3          | 72.3035                           | 0.483                     |
| rs13477517 | 3          | 81.6622                           | 0.490                     |
| rs27682879 | 4          | 7.5557                            | 0.485                     |
| rs27807782 | 4          | 14                                | 0.471                     |
| rs3719378  | 4          | 45.706                            | 0.485                     |
| rs6195490  | 4          | 57.6654                           | 0.491                     |
| rs27610338 | 4          | 69.051                            | 0.485                     |
| rs13478067 | 4          | 86.167                            | 0.482                     |
| rs13478133 | 5          | 9.968                             | 0.463                     |
| rs13478182 | 5          | 18.159                            | 0.467                     |
| rs13478245 | 5          | 26.822                            | 0.475                     |
| rs3684754  | 5          | 36.0449                           | 0.467                     |
| rs13478337 | 5          | 41.8192                           | 0.475                     |
| rs3655541  | 5          | 51.434                            | 0.488                     |
| rs3715788  | 5          | 60.5724                           | 0.497                     |
| rs6237258  | 5          | 68.258                            | 0.494                     |
| rs13478585 | 5          | 85.2381                           | 0.499                     |
| rs6172481  | 6          | 1.806                             | 0.495                     |
| rs6271324  | 6          | 15.478                            | 0.491                     |
| rs13478830 | 6          | 32.556                            | 0.487                     |
| rs6292642  | 6          | 48.928                            | 0.486                     |
| rs6361894  | 6          | 63.435                            | 0.481                     |
| rs13479152 | 7          | 12.4855                           | 0.499                     |

|            |    |         |       |
|------------|----|---------|-------|
| rs32082888 | 7  | 25.4805 | 0.493 |
| rs3675728  | 7  | 39.8674 | 0.496 |
| rs4137968  | 7  | 54.459  | 0.499 |
| rs13479530 | 7  | 73.187  | 0.482 |
| rs3023176  | 8  | 7.587   | 0.464 |
| rs13479701 | 8  | 22.3824 | 0.456 |
| rs13479794 | 8  | 31.55   | 0.458 |
| rs13479955 | 8  | 50.074  | 0.475 |
| rs13479979 | 8  | 56.197  | 0.483 |
| rs13480121 | 9  | 16.3358 | 0.500 |
| rs30458137 | 9  | 32.7528 | 0.498 |
| rs33720457 | 9  | 40.876  | 0.485 |
| rs3710939  | 9  | 57.983  | 0.492 |
| rs13480488 | 10 | 3.006   | 0.472 |
| rs13459187 | 10 | 5.143   | 0.473 |
| rs29329268 | 10 | 5.8055  | 0.469 |
| rs13480521 | 10 | 7.8605  | 0.474 |
| rs13459119 | 10 | 9.754   | 0.479 |
| rs29325765 | 10 | 47.05   | 0.465 |
| rs13480773 | 10 | 62.2764 | 0.460 |
| rs26864121 | 11 | 13.3116 | 0.476 |
| rs13480991 | 11 | 25.492  | 0.484 |
| rs13481091 | 11 | 43.7211 | 0.483 |
| rs27059631 | 11 | 58.9    | 0.500 |
| rs3706128  | 11 | 70.2894 | 0.494 |
| rs13481256 | 11 | 82.957  | 0.489 |
| rs3678500  | 12 | 9.9405  | 0.471 |
| rs13481388 | 12 | 15.533  | 0.471 |
| rs13481459 | 12 | 22.8396 | 0.473 |
| rs6333493  | 12 | 28.726  | 0.476 |
| rs13481595 | 12 | 45.422  | 0.478 |
| rs3705279  | 13 | 7.2572  | 0.493 |
| rs13459140 | 13 | 17.8688 | 0.454 |
| rs13481783 | 13 | 21.21   | 0.493 |
| rs29237897 | 13 | 35.7893 | 0.486 |
| rs29229165 | 13 | 50.4979 | 0.494 |
| rs13482037 | 13 | 67.21   | 0.493 |
| rs30637674 | 14 | 7.08    | 0.485 |
| rs13482119 | 14 | 18.657  | 0.481 |
| rs3715961  | 14 | 23.9629 | 0.484 |
| rs3653455  | 14 | 34.614  | 0.482 |
| rs6306220  | 14 | 44.0387 | 0.470 |
| rs13482356 | 14 | 56.165  | 0.478 |
| rs32275246 | 15 | 8.538   | 0.483 |
| rs13482486 | 15 | 9.493   | 0.483 |
| rs13482587 | 15 | 21.146  | 0.486 |
| rs32164372 | 15 | 38.015  | 0.488 |



|            |    |         |       |
|------------|----|---------|-------|
| rs3695692  | 15 | 48.0369 | 0.500 |
| rs32677126 | 16 | 9.636   | 0.489 |
| rs4169065  | 16 | 21.7827 | 0.486 |
| rs4189683  | 16 | 34.357  | 0.496 |
| rs4210345  | 16 | 45.7803 | 0.492 |
| rs13459152 | 17 | 22.593  | 0.474 |
| rs13483049 | 17 | 29.7243 | 0.466 |
| rs33633158 | 17 | 45.4911 | 0.463 |
| rs6358426  | 18 | 10.1    | 0.486 |
| rs29976462 | 18 | 23.8762 | 0.488 |
| rs3656892  | 18 | 42.5727 | 0.488 |
| rs30997811 | 19 | 18.3527 | 0.472 |
| rs30415214 | 19 | 35.9722 | 0.463 |
| rs30931570 | 19 | 48.4583 | 0.469 |

**Table S1**  
**SNPs in the F×B F2 and advanced intercrosses**

| SNP rsID   | Chromosome | Centimorgans,<br>Cox sex-averaged | Minor allele<br>frequency |
|------------|------------|-----------------------------------|---------------------------|
| rs6269442  | 1          | 1.614                             | 0.405                     |
| rs13475701 | 1          | 1.744                             | 0.405                     |
| rs13475706 | 1          | 1.889                             | 0.411                     |
| rs3684358  | 1          | 2.06                              | 0.412                     |
| rs13475729 | 1          | 3.749                             | 0.450                     |
| rs3671256  | 1          | 5.009                             | 0.431                     |
| rs13475750 | 1          | 6.153                             | 0.429                     |
| rs6404446  | 1          | 6.442                             | 0.430                     |
| rs31949292 | 1          | 8.486                             | 0.446                     |
| rs6173215  | 1          | 8.692                             | 0.443                     |
| rs31917015 | 1          | 10.425                            | 0.429                     |
| rs6166266  | 1          | 10.731                            | 0.417                     |
| rs3677683  | 1          | 10.932                            | 0.413                     |
| rs6384194  | 1          | 11.319                            | 0.408                     |
| rs3695988  | 1          | 11.345                            | 0.408                     |
| rs4137502  | 1          | 11.461                            | 0.410                     |
| rs31837951 | 1          | 12.249                            | 0.432                     |
| rs3707642  | 1          | 12.426                            | 0.436                     |
| rs3681732  | 1          | 12.953                            | 0.430                     |
| rs3683997  | 1          | 14.842                            | 0.414                     |
| rs4222295  | 1          | 17.369                            | 0.417                     |
| rs13475823 | 1          | 18.581                            | 0.426                     |
| rs13475827 | 1          | 20.081                            | 0.425                     |
| rs13475834 | 1          | 20.661                            | 0.428                     |
| rs13475847 | 1          | 23.851                            | 0.450                     |
| rs13475851 | 1          | 25.709                            | 0.449                     |
| rs31383619 | 1          | 25.876                            | 0.448                     |
| rs3724092  | 1          | 25.91                             | 0.448                     |
| rs13475866 | 1          | 26.334                            | 0.453                     |
| rs6322485  | 1          | 32.063                            | 0.467                     |
| rs3163007  | 1          | 32.307                            | 0.469                     |
| rs6288543  | 1          | 34.187                            | 0.479                     |
| rs6312657  | 1          | 34.68                             | 0.493                     |
| rs13475931 | 1          | 39.196                            | 0.490                     |
| rs13475934 | 1          | 39.511                            | 0.486                     |
| rs13475936 | 1          | 39.78                             | 0.482                     |
| rs13475939 | 1          | 40.572                            | 0.481                     |
| rs13475946 | 1          | 41.565                            | 0.482                     |
| rs13475952 | 1          | 42.11                             | 0.496                     |
| rs3723062  | 1          | 43.848                            | 0.415                     |
| rs32600524 | 1          | 44.067                            | 0.416                     |
| rs6195073  | 1          | 44.7                              | 0.459                     |

|            |   |         |       |
|------------|---|---------|-------|
| rs31435980 | 1 | 44.9793 | 0.459 |
| rs13475980 | 1 | 46.189  | 0.458 |
| rs6268443  | 1 | 47.188  | 0.497 |
| rs3694065  | 1 | 48.814  | 0.496 |
| rs30596698 | 1 | 49.306  | 0.496 |
| rs31680156 | 1 | 49.601  | 0.494 |
| rs3685919  | 1 | 50.674  | 0.497 |
| rs13476061 | 1 | 50.919  | 0.490 |
| rs3674655  | 1 | 52.113  | 0.458 |
| rs3678634  | 1 | 52.718  | 0.461 |
| rs4137908  | 1 | 54.799  | 0.463 |
| rs13464873 | 1 | 55.969  | 0.478 |
| rs3699561  | 1 | 56.934  | 0.484 |
| rs3724826  | 1 | 57      | 0.484 |
| rs13476119 | 1 | 58.159  | 0.471 |
| rs8250053  | 1 | 58.391  | 0.471 |
| rs30968449 | 1 | 60.722  | 0.477 |
| rs13476141 | 1 | 61.841  | 0.482 |
| rs6382880  | 1 | 62.409  | 0.483 |
| rs13476152 | 1 | 62.56   | 0.483 |
| rs3672697  | 1 | 63.104  | 0.462 |
| rs30986578 | 1 | 63.3199 | 0.462 |
| rs6411476  | 1 | 63.404  | 0.462 |
| rs13476184 | 1 | 65.303  | 0.485 |
| rs31544365 | 1 | 67.667  | 0.485 |
| rs31299650 | 1 | 69.032  | 0.480 |
| rs13476229 | 1 | 76.767  | 0.437 |
| rs3707910  | 1 | 79.926  | 0.491 |
| rs3669108  | 1 | 81.044  | 0.485 |
| rs13476265 | 1 | 83.595  | 0.440 |
| rs13476273 | 1 | 84.91   | 0.429 |
| rs3667164  | 1 | 93.199  | 0.444 |
| rs13476300 | 1 | 96.082  | 0.380 |
| rs6180557  | 1 | 97.9052 | 0.405 |
| rs27096879 | 2 | 2.2384  | 0.499 |
| rs6213083  | 2 | 2.316   | 0.499 |
| rs4136817  | 2 | 2.515   | 0.477 |
| rs6359983  | 2 | 3.79    | 0.495 |
| rs6240512  | 2 | 8.426   | 0.491 |
| rs3674936  | 2 | 14.52   | 0.405 |
| rs13459062 | 2 | 21.806  | 0.402 |
| rs32868446 | 2 | 22.274  | 0.399 |
| rs13476442 | 2 | 22.742  | 0.408 |
| rs13476439 | 2 | 24.323  | 0.439 |
| rs13476454 | 2 | 24.77   | 0.462 |
| rs13476467 | 2 | 26.974  | 0.435 |
| rs13476472 | 2 | 27.478  | 0.418 |

|            |   |        |       |
|------------|---|--------|-------|
| rs6265423  | 2 | 27.693 | 0.418 |
| rs27901975 | 2 | 29.025 | 0.465 |
| rs3725341  | 2 | 29.897 | 0.425 |
| rs13476503 | 2 | 30.511 | 0.426 |
| rs27929044 | 2 | 30.694 | 0.426 |
| rs3718711  | 2 | 31.734 | 0.426 |
| rs3672719  | 2 | 33.018 | 0.455 |
| rs33395966 | 2 | 36.722 | 0.470 |
| rs6222797  | 2 | 38.403 | 0.467 |
| rs4136610  | 2 | 41.073 | 0.464 |
| rs3664661  | 2 | 42.714 | 0.470 |
| rs13476580 | 2 | 44.165 | 0.493 |
| rs3722345  | 2 | 48.304 | 0.491 |
| rs3667007  | 2 | 49.029 | 0.491 |
| rs8273639  | 2 | 49.444 | 0.496 |
| rs13476621 | 2 | 49.887 | 0.496 |
| rs6404809  | 2 | 50.023 | 0.496 |
| rs13476636 | 2 | 50.636 | 0.460 |
| rs13476639 | 2 | 51.239 | 0.466 |
| rs13476649 | 2 | 52.255 | 0.464 |
| rs6378047  | 2 | 53.194 | 0.498 |
| rs27359225 | 2 | 53.374 | 0.498 |
| rs13476666 | 2 | 53.746 | 0.498 |
| rs13476689 | 2 | 56.063 | 0.487 |
| rs13476691 | 2 | 56.306 | 0.485 |
| rs13476698 | 2 | 56.748 | 0.476 |
| rs33283452 | 2 | 56.948 | 0.476 |
| rs4138562  | 2 | 57.704 | 0.478 |
| rs3699172  | 2 | 58.312 | 0.479 |
| rs3149106  | 2 | 59.399 | 0.485 |
| rs8279354  | 2 | 59.823 | 0.487 |
| rs3658927  | 2 | 60.369 | 0.500 |
| rs6228179  | 2 | 60.677 | 0.483 |
| rs6401493  | 2 | 61.384 | 0.497 |
| rs13476762 | 2 | 62.081 | 0.457 |
| rs3661596  | 2 | 63.204 | 0.389 |
| rs3665528  | 2 | 63.278 | 0.389 |
| rs6363071  | 2 | 71.292 | 0.459 |
| rs6209325  | 2 | 73.369 | 0.468 |
| rs27349879 | 2 | 75.407 | 0.439 |
| rs13476860 | 2 | 77.376 | 0.408 |
| rs3695266  | 2 | 78.55  | 0.346 |
| rs13476874 | 2 | 80.116 | 0.321 |
| rs3664408  | 2 | 81.738 | 0.296 |
| rs13476889 | 2 | 85.007 | 0.325 |
| rs27311433 | 2 | 88.761 | 0.361 |
| rs3726974  | 2 | 89.685 | 0.375 |

|            |   |          |       |
|------------|---|----------|-------|
| rs13476928 | 2 | 97.782   | 0.450 |
| rs13476932 | 2 | 98.14    | 0.448 |
| rs3679483  | 2 | 102.647  | 0.403 |
| rs27681559 | 2 | 102.9288 | 0.406 |
| rs13476963 | 3 | 2.104    | 0.396 |
| rs13476969 | 3 | 2.406    | 0.393 |
| rs13476973 | 3 | 2.935    | 0.383 |
| rs6248752  | 3 | 2.967    | 0.383 |
| rs13476985 | 3 | 3.23     | 0.379 |
| rs3659988  | 3 | 4.094    | 0.402 |
| rs13476997 | 3 | 4.99     | 0.390 |
| rs6235984  | 3 | 7.393    | 0.435 |
| rs13477030 | 3 | 10.99    | 0.449 |
| rs3660588  | 3 | 13.426   | 0.462 |
| rs29807239 | 3 | 14.268   | 0.442 |
| rs13477043 | 3 | 15.29    | 0.418 |
| rs29919622 | 3 | 16.101   | 0.420 |
| rs4223883  | 3 | 16.434   | 0.420 |
| rs6246699  | 3 | 17.452   | 0.432 |
| rs6324747  | 3 | 19.211   | 0.480 |
| rs30263314 | 3 | 20.388   | 0.487 |
| rs13477097 | 3 | 21.275   | 0.487 |
| rs30057783 | 3 | 21.726   | 0.492 |
| rs4139913  | 3 | 21.749   | 0.491 |
| rs6241331  | 3 | 23.549   | 0.496 |
| rs4223969  | 3 | 26.26    | 0.497 |
| rs13477126 | 3 | 27.287   | 0.496 |
| rs13477138 | 3 | 29.092   | 0.448 |
| rs13477143 | 3 | 29.302   | 0.449 |
| rs13477154 | 3 | 30.058   | 0.450 |
| rs6212539  | 3 | 30.168   | 0.480 |
| rs31430997 | 3 | 30.245   | 0.481 |
| rs13477167 | 3 | 30.735   | 0.485 |
| rs6198234  | 3 | 32.419   | 0.433 |
| rs6264454  | 3 | 32.571   | 0.433 |
| rs13477201 | 3 | 33.735   | 0.427 |
| rs3706378  | 3 | 33.755   | 0.427 |
| rs13477210 | 3 | 34.419   | 0.415 |
| rs13477217 | 3 | 34.881   | 0.429 |
| rs13477224 | 3 | 35.847   | 0.444 |
| rs13477233 | 3 | 37.284   | 0.445 |
| rs13477251 | 3 | 38.955   | 0.424 |
| rs13477268 | 3 | 40.211   | 0.403 |
| rs3022964  | 3 | 42.089   | 0.416 |
| rs3726226  | 3 | 42.961   | 0.418 |
| rs4138887  | 3 | 45.048   | 0.449 |
| rs13477299 | 3 | 45.247   | 0.461 |

|            |   |         |       |
|------------|---|---------|-------|
| rs3701653  | 3 | 45.461  | 0.474 |
| rs29690864 | 3 | 47.761  | 0.465 |
| rs13477321 | 3 | 47.987  | 0.464 |
| rs3676545  | 3 | 48.528  | 0.455 |
| rs3698700  | 3 | 49.118  | 0.460 |
| rs13477357 | 3 | 50.381  | 0.450 |
| rs3708412  | 3 | 50.969  | 0.429 |
| rs30157172 | 3 | 52.425  | 0.431 |
| rs13477404 | 3 | 60.271  | 0.500 |
| rs13477421 | 3 | 62.12   | 0.485 |
| rs30509660 | 3 | 63.036  | 0.485 |
| rs3676039  | 3 | 63.124  | 0.485 |
| rs13477439 | 3 | 64.048  | 0.480 |
| rs3090379  | 3 | 66.233  | 0.488 |
| rs6290401  | 3 | 66.587  | 0.495 |
| rs3657112  | 3 | 72.448  | 0.423 |
| rs13477494 | 3 | 76.859  | 0.431 |
| rs13477506 | 3 | 79.346  | 0.392 |
| rs30801216 | 3 | 81.07   | 0.394 |
| rs13477517 | 3 | 81.6622 | 0.443 |
| rs30353245 | 3 | 82.066  | 0.477 |
| rs3660863  | 4 | 3.374   | 0.434 |
| rs6287606  | 4 | 7.098   | 0.435 |
| rs27682879 | 4 | 7.532   | 0.464 |
| rs27682826 | 4 | 7.534   | 0.464 |
| rs13477596 | 4 | 8.599   | 0.469 |
| rs13477602 | 4 | 9.709   | 0.478 |
| rs27748877 | 4 | 10.325  | 0.482 |
| rs13477617 | 4 | 11.276  | 0.490 |
| rs3701432  | 4 | 12.487  | 0.493 |
| rs27801920 | 4 | 13.275  | 0.475 |
| rs3663744  | 4 | 13.517  | 0.475 |
| rs27807782 | 4 | 14      | 0.447 |
| rs3674908  | 4 | 14.005  | 0.447 |
| rs13477643 | 4 | 17.003  | 0.458 |
| rs3698283  | 4 | 23.004  | 0.452 |
| rs27856136 | 4 | 24.49   | 0.457 |
| rs3677770  | 4 | 29.364  | 0.466 |
| rs3712541  | 4 | 32.814  | 0.461 |
| rs27935605 | 4 | 33.958  | 0.480 |
| rs6254381  | 4 | 34.002  | 0.481 |
| rs13477838 | 4 | 42.52   | 0.406 |
| rs13477866 | 4 | 45.65   | 0.428 |
| rs28076769 | 4 | 45.6667 | 0.428 |
| rs13477883 | 4 | 47.779  | 0.402 |
| rs6324470  | 4 | 49.475  | 0.422 |
| rs6226080  | 4 | 50.643  | 0.404 |

|             |   |         |       |
|-------------|---|---------|-------|
| rs3710617   | 4 | 51.378  | 0.429 |
| rs6381371   | 4 | 53.085  | 0.453 |
| rs3692563   | 4 | 54.658  | 0.495 |
| rs3675629   | 4 | 56.727  | 0.465 |
| rs6195490   | 4 | 57.6654 | 0.497 |
| rs13477959  | 4 | 57.707  | 0.498 |
| rs6355837   | 4 | 63.346  | 0.473 |
| rs32281313  | 4 | 66.216  | 0.477 |
| rs3663950   | 4 | 67.994  | 0.465 |
| rs13478002  | 4 | 68.924  | 0.461 |
| rs27610338  | 4 | 69.051  | 0.455 |
| rs4224864   | 4 | 70.21   | 0.409 |
| rs3719891   | 4 | 75.668  | 0.461 |
| rs3023025   | 4 | 77.015  | 0.471 |
| rs13478089  | 4 | 84.321  | 0.456 |
| rs13478067  | 4 | 85.611  | 0.470 |
| rs13478068  | 4 | 86.105  | 0.475 |
| rs6279100   | 4 | 88.605  | 0.452 |
| rs3664617   | 5 | 2.537   | 0.412 |
| rs6402980   | 5 | 2.883   | 0.397 |
| rs6223482   | 5 | 3.199   | 0.396 |
| rs3714258   | 5 | 3.933   | 0.393 |
| rs3687916   | 5 | 6.151   | 0.402 |
| rs13478139  | 5 | 10.162  | 0.475 |
| rs13478154  | 5 | 13.069  | 0.483 |
| rs13469943  | 5 | 16.96   | 0.425 |
| rs3700706   | 5 | 17.391  | 0.428 |
| rs13459085  | 5 | 17.941  | 0.405 |
| rs13478182  | 5 | 18.159  | 0.406 |
| rs6256504   | 5 | 21.165  | 0.414 |
| rs13478205  | 5 | 22.295  | 0.424 |
| rs6215373   | 5 | 24.09   | 0.426 |
| rs13478223  | 5 | 25.023  | 0.427 |
| rs3659933   | 5 | 25.74   | 0.427 |
| rs29521905  | 5 | 25.98   | 0.430 |
| rs3714001   | 5 | 26.89   | 0.445 |
| rs3664008   | 5 | 29.397  | 0.451 |
| rs259632697 | 5 | 30.567  | 0.448 |
| rs29584438  | 5 | 30.975  | 0.447 |
| rs3090667   | 5 | 31.824  | 0.442 |
| rs6187409   | 5 | 32.229  | 0.437 |
| rs33138184  | 5 | 32.845  | 0.448 |
| rs3707918   | 5 | 38.702  | 0.488 |
| rs3153758   | 5 | 40.4907 | 0.469 |
| rs29678187  | 5 | 40.926  | 0.464 |
| rs3721607   | 5 | 42.897  | 0.426 |
| rs29560457  | 5 | 44.025  | 0.440 |

|            |   |         |       |
|------------|---|---------|-------|
| rs13478384 | 5 | 44.297  | 0.438 |
| rs3673049  | 5 | 44.318  | 0.438 |
| rs13478388 | 5 | 44.712  | 0.438 |
| rs6232866  | 5 | 45.474  | 0.455 |
| rs13478402 | 5 | 47.492  | 0.454 |
| rs29502845 | 5 | 47.559  | 0.455 |
| rs3661241  | 5 | 47.74   | 0.478 |
| rs3705458  | 5 | 48.326  | 0.499 |
| rs13478416 | 5 | 48.461  | 0.499 |
| rs13478451 | 5 | 53.197  | 0.497 |
| rs13478463 | 5 | 54.517  | 0.498 |
| rs13478473 | 5 | 55.949  | 0.497 |
| rs6362200  | 5 | 55.994  | 0.495 |
| rs13478479 | 5 | 56.285  | 0.479 |
| rs6255362  | 5 | 60.0892 | 0.490 |
| rs32146173 | 5 | 60.445  | 0.487 |
| rs13478518 | 5 | 66.363  | 0.454 |
| rs13478540 | 5 | 74.362  | 0.470 |
| rs13478546 | 5 | 76.004  | 0.468 |
| rs4225536  | 5 | 77.062  | 0.473 |
| rs6298689  | 5 | 78.785  | 0.461 |
| rs3656197  | 5 | 80.281  | 0.468 |
| rs13478567 | 5 | 81.309  | 0.468 |
| rs13478573 | 5 | 82.5642 | 0.467 |
| rs13478583 | 5 | 85.1753 | 0.463 |
| rs3718776  | 5 | 89.193  | 0.452 |
| rs3661828  | 6 | 1.448   | 0.442 |
| rs13478602 | 6 | 1.65    | 0.442 |
| rs6172481  | 6 | 1.888   | 0.449 |
| rs3699833  | 6 | 2.513   | 0.445 |
| rs13478617 | 6 | 3.436   | 0.444 |
| rs13478631 | 6 | 4.899   | 0.440 |
| rs13478641 | 6 | 7.199   | 0.468 |
| rs3655269  | 6 | 8.073   | 0.431 |
| rs13478656 | 6 | 8.808   | 0.421 |
| rs3671709  | 6 | 11.736  | 0.411 |
| rs13478677 | 6 | 11.989  | 0.410 |
| rs13478684 | 6 | 12.318  | 0.402 |
| rs30945099 | 6 | 15.021  | 0.368 |
| rs13478705 | 6 | 15.022  | 0.368 |
| rs13478709 | 6 | 15.265  | 0.380 |
| rs3704635  | 6 | 15.43   | 0.388 |
| rs6330932  | 6 | 16.438  | 0.441 |
| rs13478719 | 6 | 17.777  | 0.476 |
| rs6238771  | 6 | 21.815  | 0.428 |
| rs13478732 | 6 | 21.865  | 0.428 |
| rs13478745 | 6 | 23.816  | 0.429 |



|            |   |         |       |
|------------|---|---------|-------|
| rs13478753 | 6 | 24.558  | 0.470 |
| rs30910255 | 6 | 27.764  | 0.448 |
| rs13478819 | 6 | 32.381  | 0.413 |
| rs3672029  | 6 | 32.53   | 0.413 |
| rs13478830 | 6 | 32.556  | 0.412 |
| rs3699367  | 6 | 33.047  | 0.411 |
| rs6377140  | 6 | 35.012  | 0.418 |
| rs6181382  | 6 | 35.526  | 0.411 |
| rs31002289 | 6 | 35.969  | 0.410 |
| rs13459097 | 6 | 36.95   | 0.325 |
| rs30605552 | 6 | 37.538  | 0.318 |
| rs13478882 | 6 | 39.97   | 0.350 |
| rs13478891 | 6 | 40.922  | 0.352 |
| rs13478893 | 6 | 41.108  | 0.355 |
| rs6239023  | 6 | 42.752  | 0.375 |
| rs6349084  | 6 | 44.804  | 0.389 |
| rs13478919 | 6 | 45.115  | 0.384 |
| rs4138572  | 6 | 45.6    | 0.383 |
| rs6292642  | 6 | 48.559  | 0.366 |
| rs6208251  | 6 | 48.778  | 0.364 |
| rs13478971 | 6 | 51.615  | 0.366 |
| rs13478977 | 6 | 52.302  | 0.335 |
| rs6393943  | 6 | 53.019  | 0.320 |
| rs6401637  | 6 | 53.749  | 0.315 |
| rs13478997 | 6 | 55.551  | 0.309 |
| rs13479014 | 6 | 59.24   | 0.389 |
| rs6389420  | 6 | 61.973  | 0.354 |
| rs3681620  | 6 | 62.834  | 0.382 |
| rs30316697 | 6 | 63.358  | 0.387 |
| rs3722480  | 6 | 63.612  | 0.388 |
| rs6339546  | 6 | 64.542  | 0.358 |
| rs13479053 | 6 | 64.794  | 0.376 |
| rs30015657 | 6 | 65.8784 | 0.391 |
| rs3023102  | 6 | 66.215  | 0.396 |
| rs13479071 | 6 | 68.53   | 0.403 |
| rs3672808  | 6 | 69.744  | 0.447 |
| rs6329892  | 6 | 74.038  | 0.470 |
| rs3658783  | 6 | 76.543  | 0.483 |
| rs30160101 | 6 | 77.5675 | 0.468 |
| rs30848564 | 6 | 77.701  | 0.461 |
| rs6265387  | 6 | 78.094  | 0.442 |
| rs30950360 | 6 | 78.865  | 0.452 |
| rs3700068  | 7 | 2.536   | 0.469 |
| rs3714915  | 7 | 2.617   | 0.469 |
| rs13479105 | 7 | 2.689   | 0.469 |
| rs6384973  | 7 | 3.058   | 0.468 |
| rs3658362  | 7 | 7.76    | 0.465 |

|            |   |         |       |
|------------|---|---------|-------|
| rs3689218  | 7 | 9.441   | 0.491 |
| rs13479153 | 7 | 13.06   | 0.480 |
| rs31465998 | 7 | 15.8664 | 0.466 |
| rs32390275 | 7 | 16.524  | 0.462 |
| rs6239372  | 7 | 20.611  | 0.438 |
| rs32082888 | 7 | 25.4805 | 0.447 |
| rs13479208 | 7 | 27.892  | 0.444 |
| rs3719256  | 7 | 28.86   | 0.468 |
| rs31893514 | 7 | 31.277  | 0.472 |
| rs3699938  | 7 | 32.593  | 0.445 |
| rs13479243 | 7 | 32.8436 | 0.446 |
| rs13479251 | 7 | 32.929  | 0.446 |
| rs3663313  | 7 | 33.441  | 0.414 |
| rs31944466 | 7 | 33.556  | 0.417 |
| rs3714908  | 7 | 34.645  | 0.446 |
| rs13479319 | 7 | 38.358  | 0.463 |
| rs3676254  | 7 | 41.543  | 0.408 |
| rs13479339 | 7 | 43.462  | 0.442 |
| rs13479347 | 7 | 43.881  | 0.449 |
| rs13479355 | 7 | 44.319  | 0.449 |
| rs13479358 | 7 | 45.126  | 0.456 |
| rs13479363 | 7 | 45.693  | 0.469 |
| rs6213614  | 7 | 47.085  | 0.491 |
| rs13479385 | 7 | 48.729  | 0.475 |
| rs13479395 | 7 | 50.443  | 0.482 |
| rs32517623 | 7 | 50.648  | 0.481 |
| rs4226783  | 7 | 51.622  | 0.490 |
| rs13479414 | 7 | 52.15   | 0.467 |
| rs3707067  | 7 | 53.897  | 0.405 |
| rs13479427 | 7 | 54.309  | 0.421 |
| rs4137968  | 7 | 54.459  | 0.414 |
| rs3713052  | 7 | 54.621  | 0.406 |
| rs6357312  | 7 | 54.711  | 0.407 |
| rs13479461 | 7 | 58.644  | 0.437 |
| rs6275579  | 7 | 67.508  | 0.495 |
| rs13479506 | 7 | 68.039  | 0.492 |
| rs3682038  | 7 | 69.108  | 0.498 |
| rs3716088  | 7 | 76.319  | 0.484 |
| rs13479540 | 7 | 77.8094 | 0.456 |
| rs31680975 | 7 | 81.137  | 0.388 |
| rs3663988  | 7 | 84.321  | 0.314 |
| rs31198744 | 7 | 88.854  | 0.392 |
| rs6153168  | 8 | 3.092   | 0.456 |
| rs3023176  | 8 | 7.587   | 0.489 |
| rs13479619 | 8 | 7.914   | 0.485 |
| rs3657963  | 8 | 8.446   | 0.437 |
| rs13479625 | 8 | 9.266   | 0.423 |

|            |   |         |       |
|------------|---|---------|-------|
| rs33566717 | 8 | 10.583  | 0.438 |
| rs4140004  | 8 | 11.326  | 0.438 |
| rs3661760  | 8 | 11.48   | 0.438 |
| rs13479656 | 8 | 14.032  | 0.415 |
| rs13479673 | 8 | 16.533  | 0.414 |
| rs4227096  | 8 | 18.218  | 0.402 |
| rs3706948  | 8 | 18.826  | 0.402 |
| rs13479701 | 8 | 22.3824 | 0.418 |
| rs3665028  | 8 | 22.606  | 0.419 |
| rs3667738  | 8 | 23.504  | 0.406 |
| rs13479716 | 8 | 23.71   | 0.406 |
| rs3703811  | 8 | 23.87   | 0.406 |
| rs3666140  | 8 | 24.316  | 0.406 |
| rs6386110  | 8 | 24.757  | 0.439 |
| rs3719401  | 8 | 27.887  | 0.452 |
| rs13479755 | 8 | 28.863  | 0.455 |
| rs31276910 | 8 | 29.03   | 0.455 |
| rs13479768 | 8 | 29.246  | 0.455 |
| rs3707439  | 8 | 30.761  | 0.430 |
| rs3672639  | 8 | 30.936  | 0.441 |
| rs13479793 | 8 | 31.514  | 0.467 |
| rs13479794 | 8 | 31.55   | 0.467 |
| rs13479811 | 8 | 33.219  | 0.480 |
| rs3656875  | 8 | 33.567  | 0.492 |
| rs3699406  | 8 | 34.067  | 0.494 |
| rs3667475  | 8 | 34.488  | 0.479 |
| rs13479830 | 8 | 35.127  | 0.443 |
| rs36926924 | 8 | 37.45   | 0.429 |
| rs13479871 | 8 | 41.475  | 0.473 |
| rs6257357  | 8 | 41.611  | 0.473 |
| rs13479882 | 8 | 42.129  | 0.467 |
| rs13479884 | 8 | 42.33   | 0.469 |
| rs6391152  | 8 | 43.853  | 0.458 |
| rs13479922 | 8 | 44.877  | 0.454 |
| rs4137596  | 8 | 46.663  | 0.427 |
| rs6285803  | 8 | 48.12   | 0.436 |
| rs6287320  | 8 | 48.493  | 0.435 |
| rs13479947 | 8 | 49.503  | 0.443 |
| rs3706149  | 8 | 50.061  | 0.443 |
| rs13479955 | 8 | 50.074  | 0.443 |
| rs3669235  | 8 | 50.253  | 0.443 |
| rs13479956 | 8 | 50.34   | 0.443 |
| rs3662808  | 8 | 56.991  | 0.439 |
| rs6237645  | 8 | 57.389  | 0.444 |
| rs33401493 | 8 | 63.315  | 0.481 |
| rs3708073  | 8 | 70.716  | 0.444 |
| rs6310696  | 8 | 70.824  | 0.446 |

|            |   |         |       |
|------------|---|---------|-------|
| rs6377872  | 8 | 71      | 0.450 |
| rs3705725  | 8 | 72.309  | 0.458 |
| rs31833030 | 8 | 72.3393 | 0.458 |
| rs13480087 | 9 | 7.064   | 0.452 |
| rs13480092 | 9 | 7.305   | 0.452 |
| rs13480095 | 9 | 7.4084  | 0.456 |
| rs8270115  | 9 | 7.927   | 0.475 |
| rs13480103 | 9 | 9.511   | 0.473 |
| rs3088801  | 9 | 10.106  | 0.473 |
| rs6404775  | 9 | 14.314  | 0.499 |
| rs6385855  | 9 | 15.145  | 0.487 |
| rs3655898  | 9 | 18.165  | 0.418 |
| rs30437276 | 9 | 20.114  | 0.445 |
| rs6413270  | 9 | 20.806  | 0.426 |
| rs33646953 | 9 | 24.4263 | 0.443 |
| rs13462199 | 9 | 24.739  | 0.444 |
| rs13480173 | 9 | 25.485  | 0.451 |
| rs6395817  | 9 | 25.803  | 0.464 |
| rs13480179 | 9 | 26.352  | 0.464 |
| rs13480186 | 9 | 27.114  | 0.496 |
| rs3723670  | 9 | 28.839  | 0.496 |
| rs13480208 | 9 | 29.932  | 0.470 |
| rs13480217 | 9 | 31.394  | 0.496 |
| rs6224703  | 9 | 32.333  | 0.498 |
| rs30458137 | 9 | 32.7528 | 0.496 |
| rs3714012  | 9 | 33.18   | 0.493 |
| rs3655717  | 9 | 35.34   | 0.493 |
| rs6174757  | 9 | 36.954  | 0.492 |
| rs6355445  | 9 | 39.122  | 0.482 |
| rs3721056  | 9 | 39.7    | 0.488 |
| rs13480271 | 9 | 40.24   | 0.496 |
| rs33720457 | 9 | 40.876  | 0.489 |
| rs3724833  | 9 | 41.977  | 0.479 |
| rs13480285 | 9 | 42.583  | 0.483 |
| rs13480298 | 9 | 43.863  | 0.484 |
| rs3676124  | 9 | 45.286  | 0.485 |
| rs3695050  | 9 | 46.021  | 0.460 |
| rs3700596  | 9 | 46.512  | 0.494 |
| rs3669564  | 9 | 47.114  | 0.496 |
| rs13480340 | 9 | 47.798  | 0.470 |
| rs13480345 | 9 | 48.379  | 0.471 |
| rs13480351 | 9 | 48.893  | 0.461 |
| rs29789189 | 9 | 50.284  | 0.420 |
| rs3689336  | 9 | 50.613  | 0.423 |
| rs13480365 | 9 | 51.376  | 0.423 |
| rs3717654  | 9 | 54.162  | 0.413 |
| rs30343415 | 9 | 55.0782 | 0.431 |

|            |    |         |       |
|------------|----|---------|-------|
| rs13480399 | 9  | 57.487  | 0.475 |
| rs13480407 | 9  | 59.514  | 0.461 |
| rs13480428 | 9  | 63.934  | 0.449 |
| rs6320810  | 9  | 67.636  | 0.402 |
| rs3669563  | 9  | 69.841  | 0.447 |
| rs13459114 | 9  | 72.67   | 0.487 |
| rs6304156  | 9  | 73.664  | 0.484 |
| rs6185923  | 10 | 0.438   | 0.471 |
| rs29368538 | 10 | 1.298   | 0.464 |
| rs3721803  | 10 | 1.696   | 0.464 |
| rs13480488 | 10 | 3.006   | 0.442 |
| rs3664101  | 10 | 3.154   | 0.439 |
| rs4228112  | 10 | 4.417   | 0.446 |
| rs13459187 | 10 | 5.143   | 0.443 |
| rs29329268 | 10 | 5.8055  | 0.441 |
| rs3699409  | 10 | 5.979   | 0.440 |
| rs13480521 | 10 | 7.8605  | 0.466 |
| rs13459119 | 10 | 9.293   | 0.487 |
| rs13480534 | 10 | 9.7958  | 0.489 |
| rs3679120  | 10 | 10.4    | 0.494 |
| rs13480547 | 10 | 11.755  | 0.494 |
| rs13480554 | 10 | 12.941  | 0.498 |
| rs13480566 | 10 | 16.478  | 0.472 |
| rs13480578 | 10 | 18.922  | 0.465 |
| rs13480579 | 10 | 19.237  | 0.427 |
| rs13480601 | 10 | 23.19   | 0.463 |
| rs13480605 | 10 | 23.8239 | 0.470 |
| rs3696307  | 10 | 27.314  | 0.492 |
| rs13480621 | 10 | 30.574  | 0.460 |
| rs13480627 | 10 | 34.7364 | 0.408 |
| rs13480630 | 10 | 35.028  | 0.403 |
| rs29332616 | 10 | 37.031  | 0.446 |
| rs13480652 | 10 | 38.38   | 0.449 |
| rs13480657 | 10 | 38.917  | 0.473 |
| rs3717445  | 10 | 40.766  | 0.477 |
| rs13480678 | 10 | 41.5    | 0.478 |
| rs3679902  | 10 | 41.674  | 0.478 |
| rs3089366  | 10 | 45.073  | 0.481 |
| rs13480702 | 10 | 45.499  | 0.477 |
| rs29325765 | 10 | 47.05   | 0.464 |
| rs13480710 | 10 | 47.545  | 0.459 |
| rs13480712 | 10 | 48.536  | 0.459 |
| rs13480716 | 10 | 48.973  | 0.460 |
| rs13480722 | 10 | 50.35   | 0.476 |
| rs3710293  | 10 | 51.414  | 0.442 |
| rs3688351  | 10 | 54.723  | 0.431 |
| rs6290359  | 10 | 56.295  | 0.443 |

|            |    |         |       |
|------------|----|---------|-------|
| rs6243755  | 10 | 56.692  | 0.443 |
| rs29353606 | 10 | 61.545  | 0.359 |
| rs3680872  | 10 | 61.556  | 0.359 |
| rs29360855 | 10 | 67.701  | 0.360 |
| rs3697243  | 10 | 73.832  | 0.376 |
| rs3676330  | 10 | 76.442  | 0.383 |
| rs13480836 | 11 | 2.495   | 0.424 |
| rs13480837 | 11 | 2.735   | 0.424 |
| rs13480863 | 11 | 5.918   | 0.424 |
| rs26925478 | 11 | 6.126   | 0.425 |
| rs3023249  | 11 | 6.662   | 0.424 |
| rs13480875 | 11 | 7.335   | 0.431 |
| rs29389113 | 11 | 10.513  | 0.470 |
| rs13480910 | 11 | 14.219  | 0.411 |
| rs3700830  | 11 | 17.794  | 0.450 |
| rs13459123 | 11 | 18.321  | 0.468 |
| rs26822994 | 11 | 18.8679 | 0.468 |
| rs3723833  | 11 | 19.079  | 0.467 |
| rs13480968 | 11 | 22.232  | 0.469 |
| rs6359329  | 11 | 23.638  | 0.491 |
| rs13480996 | 11 | 25.809  | 0.499 |
| rs3654344  | 11 | 25.922  | 0.500 |
| rs26898753 | 11 | 27.389  | 0.500 |
| rs13481009 | 11 | 27.986  | 0.500 |
| rs13481011 | 11 | 28.08   | 0.499 |
| rs13481033 | 11 | 32.472  | 0.452 |
| rs4228731  | 11 | 33.04   | 0.451 |
| rs3684076  | 11 | 33.7    | 0.468 |
| rs3697686  | 11 | 36.25   | 0.456 |
| rs3711357  | 11 | 37.947  | 0.475 |
| rs13481076 | 11 | 40.59   | 0.404 |
| rs6197743  | 11 | 42.96   | 0.413 |
| rs13481109 | 11 | 46.074  | 0.392 |
| rs13481119 | 11 | 46.826  | 0.365 |
| rs13481145 | 11 | 52.843  | 0.332 |
| rs3714299  | 11 | 58.424  | 0.443 |
| rs27059631 | 11 | 58.9    | 0.444 |
| rs3661058  | 11 | 62.745  | 0.440 |
| rs6393948  | 11 | 67.403  | 0.477 |
| rs3698446  | 11 | 68.645  | 0.477 |
| rs6386362  | 11 | 70.093  | 0.482 |
| rs6370458  | 11 | 71.91   | 0.497 |
| rs13481227 | 11 | 73.596  | 0.416 |
| rs3672597  | 11 | 75.82   | 0.391 |
| rs3699056  | 11 | 79.467  | 0.375 |
| rs13481256 | 11 | 82.957  | 0.443 |
| rs3712881  | 11 | 84.892  | 0.476 |

|            |    |         |       |
|------------|----|---------|-------|
| rs13481303 | 12 | 5.626   | 0.436 |
| rs3706330  | 12 | 7.88    | 0.457 |
| rs13481321 | 12 | 7.923   | 0.458 |
| rs13481324 | 12 | 8.117   | 0.460 |
| rs3717860  | 12 | 8.495   | 0.456 |
| rs13481363 | 12 | 10.543  | 0.436 |
| rs3089800  | 12 | 11.63   | 0.425 |
| rs13481371 | 12 | 12.768  | 0.425 |
| rs6223000  | 12 | 14.927  | 0.433 |
| rs13481388 | 12 | 15.533  | 0.434 |
| rs6311081  | 12 | 16.814  | 0.435 |
| rs3658100  | 12 | 17.537  | 0.435 |
| rs13481406 | 12 | 18.11   | 0.451 |
| rs13481408 | 12 | 18.369  | 0.451 |
| rs29148707 | 12 | 20.993  | 0.485 |
| rs3670749  | 12 | 22.242  | 0.464 |
| rs13481459 | 12 | 22.8396 | 0.462 |
| rs3706319  | 12 | 25.397  | 0.452 |
| rs29158995 | 12 | 25.941  | 0.464 |
| rs13481496 | 12 | 26.705  | 0.479 |
| rs13481514 | 12 | 28.892  | 0.460 |
| rs13481527 | 12 | 30.34   | 0.472 |
| rs3655558  | 12 | 32.585  | 0.447 |
| rs13481541 | 12 | 33.626  | 0.455 |
| rs3662628  | 12 | 35.986  | 0.492 |
| rs29176418 | 12 | 36.457  | 0.495 |
| rs13481565 | 12 | 38.807  | 0.491 |
| rs29184538 | 12 | 43.833  | 0.437 |
| rs3670410  | 12 | 44.326  | 0.436 |
| rs13481588 | 12 | 45.007  | 0.435 |
| rs13481592 | 12 | 45.198  | 0.439 |
| rs6207869  | 12 | 45.478  | 0.444 |
| rs13481599 | 12 | 46.455  | 0.448 |
| rs13481604 | 12 | 49.82   | 0.483 |
| rs3716084  | 12 | 50.269  | 0.462 |
| rs13481614 | 12 | 51.183  | 0.486 |
| rs13481632 | 12 | 56.892  | 0.461 |
| rs6390948  | 12 | 59.558  | 0.469 |
| rs13481655 | 12 | 61.147  | 0.493 |
| rs3023711  | 12 | 62.619  | 0.480 |
| rs29249127 | 13 | 1.733   | 0.465 |
| rs6215262  | 13 | 2.1     | 0.464 |
| rs13481668 | 13 | 2.487   | 0.464 |
| rs13481673 | 13 | 2.837   | 0.442 |
| rs6348604  | 13 | 5.492   | 0.475 |
| rs3023379  | 13 | 6.3652  | 0.468 |
| rs13481715 | 13 | 6.898   | 0.464 |

|            |    |         |       |
|------------|----|---------|-------|
| rs6314295  | 13 | 7.214   | 0.458 |
| rs3705279  | 13 | 7.2572  | 0.458 |
| rs3679784  | 13 | 7.543   | 0.460 |
| rs3663223  | 13 | 9.387   | 0.437 |
| rs13481767 | 13 | 16.31   | 0.485 |
| rs13481783 | 13 | 21.21   | 0.487 |
| rs3712907  | 13 | 21.327  | 0.498 |
| rs3688207  | 13 | 21.883  | 0.492 |
| rs6411274  | 13 | 24.301  | 0.493 |
| rs6244558  | 13 | 24.703  | 0.492 |
| rs3693942  | 13 | 29.453  | 0.490 |
| rs3690198  | 13 | 32.531  | 0.499 |
| rs4229817  | 13 | 34.532  | 0.474 |
| rs29730990 | 13 | 34.544  | 0.474 |
| rs13481871 | 13 | 37.601  | 0.460 |
| rs13481880 | 13 | 40.224  | 0.489 |
| rs13481883 | 13 | 40.871  | 0.488 |
| rs13481908 | 13 | 43.36   | 0.472 |
| rs29247893 | 13 | 43.678  | 0.472 |
| rs29565666 | 13 | 44.743  | 0.472 |
| rs29932904 | 13 | 45.235  | 0.471 |
| rs6288319  | 13 | 46.504  | 0.449 |
| rs6316213  | 13 | 47.483  | 0.431 |
| rs13481943 | 13 | 47.76   | 0.431 |
| rs29229165 | 13 | 50.4979 | 0.404 |
| rs13481961 | 13 | 50.925  | 0.399 |
| rs13481968 | 13 | 52.195  | 0.404 |
| rs13481983 | 13 | 55.812  | 0.425 |
| rs13459786 | 13 | 58.109  | 0.424 |
| rs13482005 | 13 | 59.736  | 0.403 |
| rs13482022 | 13 | 64.043  | 0.432 |
| rs6247696  | 13 | 64.656  | 0.433 |
| rs13482028 | 13 | 64.842  | 0.434 |
| rs13482035 | 13 | 66.772  | 0.433 |
| rs13482037 | 13 | 67.21   | 0.437 |
| rs4230144  | 14 | 4.71    | 0.477 |
| rs6322899  | 14 | 5.762   | 0.488 |
| rs6290836  | 14 | 6.421   | 0.480 |
| rs30637674 | 14 | 7.08    | 0.479 |
| rs3687889  | 14 | 11.062  | 0.481 |
| rs30721414 | 14 | 11.9357 | 0.459 |
| rs13482096 | 14 | 12.574  | 0.442 |
| rs3692121  | 14 | 14.111  | 0.447 |
| rs13482104 | 14 | 15.674  | 0.470 |
| rs6396829  | 14 | 16.608  | 0.466 |
| rs13482119 | 14 | 18.657  | 0.473 |
| rs13482143 | 14 | 22.258  | 0.475 |



|            |    |         |       |
|------------|----|---------|-------|
| rs13482159 | 14 | 23.452  | 0.480 |
| rs3715961  | 14 | 23.9629 | 0.474 |
| rs13482170 | 14 | 25.173  | 0.458 |
| rs3666583  | 14 | 26.733  | 0.470 |
| rs13482191 | 14 | 27.71   | 0.470 |
| rs13482194 | 14 | 28.17   | 0.469 |
| rs13482216 | 14 | 33.165  | 0.495 |
| rs3672425  | 14 | 35.55   | 0.472 |
| rs13482247 | 14 | 37.396  | 0.445 |
| rs6284633  | 14 | 37.5422 | 0.445 |
| rs13459144 | 14 | 40.316  | 0.443 |
| rs13482265 | 14 | 42.277  | 0.424 |
| rs13482284 | 14 | 43.806  | 0.420 |
| rs3708535  | 14 | 44.007  | 0.421 |
| rs13482296 | 14 | 44.438  | 0.421 |
| rs6395984  | 14 | 45.189  | 0.410 |
| rs6291434  | 14 | 45.459  | 0.410 |
| rs13482311 | 14 | 45.801  | 0.422 |
| rs30835762 | 14 | 45.957  | 0.424 |
| rs13482327 | 14 | 47.839  | 0.442 |
| rs3692362  | 14 | 49.712  | 0.441 |
| rs30942806 | 14 | 52.61   | 0.441 |
| rs13482354 | 14 | 56.151  | 0.460 |
| rs3654132  | 14 | 56.158  | 0.460 |
| rs13482375 | 14 | 57.817  | 0.475 |
| rs6256423  | 14 | 58.78   | 0.429 |
| rs6169105  | 14 | 60.717  | 0.419 |
| rs3665550  | 14 | 62.625  | 0.417 |
| rs13482398 | 14 | 63.475  | 0.438 |
| rs13482407 | 14 | 65.852  | 0.418 |
| rs31594308 | 15 | 1.843   | 0.477 |
| rs13482418 | 15 | 1.849   | 0.477 |
| rs3665826  | 15 | 2.032   | 0.474 |
| rs31671106 | 15 | 3.823   | 0.500 |
| rs31927778 | 15 | 4.44    | 0.492 |
| rs13482431 | 15 | 5.575   | 0.446 |
| rs3711814  | 15 | 6.248   | 0.410 |
| rs31608298 | 15 | 7.706   | 0.424 |
| rs32187076 | 15 | 7.773   | 0.424 |
| rs13482455 | 15 | 7.869   | 0.424 |
| rs3715857  | 15 | 8.139   | 0.424 |
| rs13482477 | 15 | 8.543   | 0.424 |
| rs32275246 | 15 | 8.617   | 0.424 |
| rs13482497 | 15 | 11.032  | 0.414 |
| rs13482504 | 15 | 12.282  | 0.427 |
| rs32084485 | 15 | 12.5423 | 0.430 |
| rs6188239  | 15 | 14.103  | 0.444 |

|            |    |         |       |
|------------|----|---------|-------|
| rs13482529 | 15 | 15.274  | 0.438 |
| rs32312277 | 15 | 16.751  | 0.459 |
| rs13482543 | 15 | 16.809  | 0.459 |
| rs13482549 | 15 | 17.395  | 0.442 |
| rs3707900  | 15 | 19.919  | 0.436 |
| rs13482585 | 15 | 21.175  | 0.466 |
| rs13482595 | 15 | 25.03   | 0.460 |
| rs31824103 | 15 | 29.0311 | 0.398 |
| rs13482628 | 15 | 29.421  | 0.391 |
| rs13482637 | 15 | 32.182  | 0.393 |
| rs13482661 | 15 | 37.583  | 0.425 |
| rs3665030  | 15 | 37.745  | 0.427 |
| rs32164372 | 15 | 38.015  | 0.431 |
| rs6276391  | 15 | 38.245  | 0.434 |
| rs13482695 | 15 | 43.934  | 0.451 |
| rs13482704 | 15 | 45.108  | 0.461 |
| rs13482712 | 15 | 46.484  | 0.487 |
| rs6285067  | 15 | 49.907  | 0.443 |
| rs13482751 | 15 | 58.021  | 0.471 |
| rs4152638  | 16 | 2.426   | 0.386 |
| rs4152790  | 16 | 2.475   | 0.386 |
| rs4231060  | 16 | 2.889   | 0.390 |
| rs4157412  | 16 | 3.4148  | 0.389 |
| rs4158907  | 16 | 3.509   | 0.389 |
| rs32677126 | 16 | 9.636   | 0.414 |
| rs4165081  | 16 | 12.309  | 0.409 |
| rs4165279  | 16 | 12.645  | 0.407 |
| rs4167031  | 16 | 19.714  | 0.461 |
| rs4168640  | 16 | 21.374  | 0.481 |
| rs4170308  | 16 | 22.749  | 0.476 |
| rs4171440  | 16 | 24.104  | 0.489 |
| rs4177651  | 16 | 27.831  | 0.477 |
| rs4179075  | 16 | 28.385  | 0.474 |
| rs4182243  | 16 | 30.376  | 0.453 |
| rs4183448  | 16 | 30.604  | 0.453 |
| rs4185639  | 16 | 31.431  | 0.469 |
| rs4186744  | 16 | 32.099  | 0.468 |
| rs3696661  | 16 | 32.767  | 0.458 |
| rs6163640  | 16 | 32.971  | 0.453 |
| rs4189277  | 16 | 34.227  | 0.460 |
| rs4189683  | 16 | 34.357  | 0.456 |
| rs4191367  | 16 | 34.819  | 0.440 |
| rs4193069  | 16 | 36.067  | 0.427 |
| rs4194417  | 16 | 36.445  | 0.427 |
| rs4197416  | 16 | 37.958  | 0.417 |
| rs4197715  | 16 | 38.865  | 0.410 |
| rs4200124  | 16 | 40.292  | 0.418 |

|            |    |        |       |
|------------|----|--------|-------|
| rs4201998  | 16 | 40.906 | 0.418 |
| rs6317052  | 16 | 45.623 | 0.373 |
| rs4211364  | 16 | 45.892 | 0.388 |
| rs4211664  | 16 | 46.759 | 0.417 |
| rs3680665  | 16 | 46.916 | 0.418 |
| rs4212102  | 16 | 47.413 | 0.413 |
| rs4213268  | 16 | 49.112 | 0.397 |
| rs4214396  | 16 | 49.568 | 0.397 |
| rs4217260  | 16 | 51.637 | 0.371 |
| rs4219905  | 16 | 54.059 | 0.387 |
| rs3712360  | 16 | 54.488 | 0.387 |
| rs3696981  | 16 | 57.427 | 0.397 |
| rs4136382  | 17 | 2.001  | 0.428 |
| rs13482845 | 17 | 2.515  | 0.465 |
| rs33373629 | 17 | 3.756  | 0.468 |
| rs3672987  | 17 | 17.806 | 0.386 |
| rs6390174  | 17 | 19.311 | 0.397 |
| rs3702604  | 17 | 19.559 | 0.388 |
| rs33178797 | 17 | 19.602 | 0.388 |
| rs6409750  | 17 | 22.923 | 0.449 |
| rs13483016 | 17 | 25.749 | 0.433 |
| rs6272475  | 17 | 27.907 | 0.433 |
| rs3714226  | 17 | 28.823 | 0.420 |
| rs3727008  | 17 | 38.866 | 0.483 |
| rs3675634  | 17 | 42.179 | 0.495 |
| rs3691628  | 17 | 44.65  | 0.459 |
| rs13483103 | 17 | 45.436 | 0.477 |
| rs13483117 | 17 | 49.683 | 0.490 |
| rs13483119 | 17 | 50.304 | 0.491 |
| rs13483131 | 17 | 51.965 | 0.491 |
| rs13483135 | 17 | 53.085 | 0.461 |
| rs13483144 | 17 | 56.362 | 0.478 |
| rs4231720  | 17 | 56.873 | 0.468 |
| rs33117354 | 17 | 59.733 | 0.460 |
| rs6288047  | 17 | 60.459 | 0.457 |
| rs6397044  | 17 | 60.64  | 0.446 |
| rs13483183 | 18 | 2.302  | 0.414 |
| rs29628302 | 18 | 3.578  | 0.406 |
| rs4231742  | 18 | 5.653  | 0.411 |
| rs13483212 | 18 | 6.068  | 0.406 |
| rs30271401 | 18 | 8.002  | 0.412 |
| rs6358426  | 18 | 10.034 | 0.442 |
| rs13483244 | 18 | 11.555 | 0.468 |
| rs4138020  | 18 | 11.996 | 0.446 |
| rs3722973  | 18 | 17.694 | 0.487 |
| rs3664831  | 18 | 19.514 | 0.497 |
| rs6220251  | 18 | 21.395 | 0.453 |

|             |    |         |       |
|-------------|----|---------|-------|
| rs3676196   | 18 | 22.966  | 0.413 |
| rs4231834   | 18 | 23.625  | 0.458 |
| rs29976462  | 18 | 23.8762 | 0.451 |
| rs30176009  | 18 | 24.277  | 0.441 |
| rs13483364  | 18 | 28.334  | 0.379 |
| rs29626928  | 18 | 34.209  | 0.429 |
| rs8237402   | 18 | 35.096  | 0.428 |
| rs3688789   | 18 | 37.483  | 0.428 |
| rs3691542   | 18 | 39.503  | 0.475 |
| rs13483432  | 18 | 45.629  | 0.456 |
| rs13483436  | 18 | 48.825  | 0.434 |
| rs13459193  | 18 | 50.842  | 0.473 |
| rs13483446  | 18 | 51.811  | 0.476 |
| rs3720876   | 18 | 53.237  | 0.474 |
| rs13483466  | 18 | 55.727  | 0.440 |
| rs29667966  | 18 | 57.837  | 0.499 |
| rs13483482  | 18 | 58.209  | 0.495 |
| rs30456650  | 19 | 3.3776  | 0.487 |
| rs6236348   | 19 | 4.441   | 0.487 |
| rs30517739  | 19 | 7.103   | 0.466 |
| rs6316813   | 19 | 8.177   | 0.434 |
| rs30697936  | 19 | 8.771   | 0.490 |
| rs31280015  | 19 | 10.1503 | 0.483 |
| rs3686467   | 19 | 12.273  | 0.475 |
| rs30604569  | 19 | 13.2036 | 0.474 |
| rs13483556  | 19 | 13.705  | 0.474 |
| rs6309315   | 19 | 18.426  | 0.425 |
| rs6293693   | 19 | 20.923  | 0.394 |
| rs3090325   | 19 | 21.258  | 0.416 |
| rs30746021  | 19 | 21.7875 | 0.414 |
| rs13459194  | 19 | 26.625  | 0.384 |
| rs6237466   | 19 | 27.057  | 0.385 |
| rs30396271  | 19 | 29.792  | 0.397 |
| rs30364728  | 19 | 29.987  | 0.398 |
| rs30920120  | 19 | 32.228  | 0.395 |
| rs3655407   | 19 | 34.251  | 0.404 |
| rs30415214  | 19 | 35.9722 | 0.400 |
| rs3656289   | 19 | 36.17   | 0.399 |
| rs3687275   | 19 | 36.617  | 0.392 |
| rs13461374  | 19 | 36.6975 | 0.390 |
| rs13483643  | 19 | 38.427  | 0.356 |
| rs3023496   | 19 | 41.195  | 0.369 |
| rs6304326   | 19 | 47.937  | 0.456 |
| rs30931570  | 19 | 48.4583 | 0.453 |
| rs13483682  | 19 | 51.073  | 0.435 |
| rs249259485 | 19 | 56.384  | 0.454 |

**Table S2.** Modifier loci by cross and defect.

A×B, LOD. F×B, -log(p).

**Bold**, genome-wide significant. Non-bold, suggestive.

\*, estimated marker. The closest SNP is indicated.

The locus interval is bounded by the 1 LOD or -log(p) drop from the peak SNP.

| Cross | Defect  | Peak SNP                    | Locus interval                           | LOD or -log(p) | Risk Allele | Candidate genes                                            |
|-------|---------|-----------------------------|------------------------------------------|----------------|-------------|------------------------------------------------------------|
| A×B   | ASD     | <a href="#">rs6238909</a>   | <a href="#">chr1:125665904-182054904</a> | 2.88           | B           | <i>Csrp1, Lefty1, Lefty2, Pitx2, Vangl2</i>                |
| A×B   | ASD     | <a href="#">rs31135898</a>  | <a href="#">chr3:52939690-158052844</a>  | 3.22           | A           | <i>Bmpr1b, Notch2, Pifo, Pitx2</i>                         |
| A×B   | ASD     | <a href="#">rs13478067*</a> | <a href="#">chr4:124165816-154991070</a> | 2.69           | A           |                                                            |
| A×B   | Mbr.VSD | <a href="#">rs3659784</a>   | <a href="#">chr2:31172022-152809607</a>  | <b>3.42</b>    | A           | <i>Actc1, Acvr1, Bbs5, Jag1, Lrp2, Mkks, Ttc21b, Zeb2</i>  |
| A×B   | Mbr.VSD | <a href="#">rs27610338</a>  | <a href="#">chr4:100332046-154991070</a> | <b>5.60</b>    | A           | <i>Ptch2</i>                                               |
| A×B   | Mbr.VSD | <a href="#">rs13479701</a>  | <a href="#">chr8:14759093-62208384</a>   | <b>3.81</b>    | A           | <i>Hand2, Vegfc,</i>                                       |
| A×B   | Mbr.VSD | <a href="#">rs13482119</a>  | <a href="#">chr14:17628076-67124319</a>  | 2.92           | B           | <i>Bmp4, Bmpr1a, Esco2, Gata4, Ift88, Myh6</i>             |
| A×B   | Mbr.VSD | <a href="#">rs30415214</a>  | <a href="#">chr19:23376527-53761523</a>  | <b>3.55</b>    | B           | <i>Acta2, Fgf8</i>                                         |
| A×B   | Mus.VSD | <a href="#">rs13479794</a>  | <a href="#">chr8:14759093-108947107</a>  | <b>3.77</b>    | A           | <i>Bbs2, Gdf1, Hand2, Nfatc3, Sall1, Vegfc</i>             |
| A×B   | Mus.VSD | <a href="#">rs13482037</a>  | <a href="#">chr13:96099181-118789220</a> | <b>5.87</b>    | B           | <i>Fgf10, Isl1</i>                                         |
| A×B   | AVSD    | <a href="#">rs13477291</a>  | <a href="#">chr3:75914491-136196844</a>  | <b>4.98</b>    | A           | <i>Notch2, Pifo, Pitx2</i>                                 |
| A×B   | AVSD    | <a href="#">rs27610338*</a> | <a href="#">chr4:100332046-154991070</a> | <b>3.40</b>    | A           | <i>Ptch2</i>                                               |
| A×B   | AVSD    | <a href="#">rs13478337</a>  | <a href="#">chr5:35506765-129965381</a>  | <b>4.08</b>    | B           | <i>Cc2d2a, Evc, Evc2. Pkd2, Ptpn11, Med13l, Tbx3, Tbx5</i> |
| F×B   | ASD     | <a href="#">rs6304156</a>   | <a href="#">chr9:121915911-123153990</a> | 3.02           | B           |                                                            |
| F×B   | Mbr.VSD | <a href="#">rs6292642</a>   | <a href="#">chr6:94055997-111299794</a>  | <b>6.12</b>    | B           | <i>Foxp1</i>                                               |
| F×B   | Mbr.VSD | <a href="#">rs3657963</a>   | <a href="#">chr8:15279371-17579118</a>   | <b>4.98</b>    | F           | <i>Csmd1</i>                                               |
| F×B   | Mus.VSD | <a href="#">rs6349084</a>   | <a href="#">chr6:85961013-104553235</a>  | 3.13           | B           | <i>Prickle2, Foxp1</i>                                     |
| F×B   | AVSD    | <a href="#">rs6255362</a>   | <a href="#">chr5:116106456-134045067</a> | <b>4.74</b>    | B           | <i>Ptpn11, Med13l, Tbx3, Tbx5</i>                          |
| F×B   | AVSD    | <a href="#">rs4217260</a>   | <a href="#">chr16:85097188-93538107</a>  | 2.73           | F           |                                                            |
